# Supplementary material for: TRIM6: An Upregulated Biomarker with Prognostic Significance and Immune Correlations in Gliomas
Source: Preprints.org preprint supplement (doi:10.20944/preprints202308.0544.v1), 2023-08-07
Supplement: Supplementary file 1 [file supplementary]

Table S1 Cox regression analyses to explore the independent indicators of DSS in Gliomas

| Characteristics | Total(N) | Univariate analysis | |  | Multivariate analysis | |
| --- | --- | --- | --- | --- | --- | --- |
| Hazard ratio (95% CI) | P value | Hazard ratio (95% CI) | P value |
| WHO grade | 614 |  |  |  |  |  |
| G2 | 220 | Reference |  |  |  |  |
| G3 | 239 | 3.098 (2.023-4.744) | **<0.001** |  | 1.621 (0.983-2.674) | 0.059 |
| G4 | 155 | 19.243 (12.572-29.455) | **<0.001** |  | 4.481 (1.370-14.650) | **0.013** |
| IDH status | 664 |  |  |  |  |  |
| WT | 232 | Reference |  |  |  |  |
| Mut | 432 | 0.110 (0.083-0.146) | **<0.001** |  | 0.468 (0.262-0.836) | **0.010** |
| 1p/19q codeletion | 668 |  |  |  |  |  |
| codel | 169 | Reference |  |  |  |  |
| non-codel | 499 | 4.987 (3.117-7.978) | **<0.001** |  | 1.041 (0.510-2.124) | 0.912 |
| Primary therapy outcome | 457 |  |  |  |  |  |
| PD | 111 | Reference |  |  |  |  |
| SD | 144 | 0.372 (0.242-0.572) | **<0.001** |  | 0.312 (0.178-0.548) | **<0.001** |
| PR | 64 | 0.138 (0.056-0.343) | **<0.001** |  | 0.140 (0.043-0.457) | **0.001** |
| CR | 138 | 0.116 (0.053-0.252) | **<0.001** |  | 0.152 (0.067-0.348) | **<0.001** |
| Gender | 674 |  |  |  |  |  |
| Female | 289 | Reference |  |  |  |  |
| Male | 385 | 1.248 (0.965-1.614) | 0.092 |  | 1.711 (1.065-2.746) | **0.026** |
| Age | 674 |  |  |  |  |  |
| <=60 | 541 | Reference |  |  |  |  |
| >60 | 133 | 4.500 (3.409-5.940) | **<0.001** |  | 3.687 (2.146-6.332) | **<0.001** |
| Histological type | 674 |  |  |  |  |  |
| Astrocytoma | 192 | Reference |  |  |  |  |
| Glioblastoma | 155 | 6.602 (4.739-9.197) | **<0.001** |  |  |  |
| Oligoastrocytoma | 132 | 0.604 (0.374-0.975) | **0.039** |  | 1.107 (0.624-1.966) | 0.728 |
| Oligodendroglioma | 195 | 0.543 (0.363-0.813) | **0.003** |  | 0.580 (0.321-1.046) | 0.070 |
| TRIM6 | 674 |  |  |  |  |  |
| Low | 340 | Reference |  |  |  |  |
| High | 334 | 4.421 (3.309-5.907) | **<0.001** |  | 1.716 (1.080-2.726) | **0.022** |
